# Supplementary material
Source: Springer Nature journal article supplement (https://www.springermedizin.de/resource/supplementary/12967_2009_353_MOESM1_ESM.pdf/9576286)
Supplement: MOESM1 [file 9576286]

**Additional file 1. All variables measured in the study.**

The upper part of the table shows the five different surfaces used for measuring platelet adhesion and all different additions of external activators made for each surface. All numerals indicate concentration in  $\mu\text{mol/L}$  except for ristocetin where the unit of concentration is  $\text{mg/mL}$ . Semicolons separate different concentrations of the same agonist. The lower part shows the different activating stimuli used for the flow cytometric measurements of fibrinogen-binding and P-selectin surface expression respectively. Also shown are the other measures not involving platelet adhesion or flow cytometry. Abbreviations are as follows: ADP = adenosine 5'-diphosphate, Adr = adrenaline, Risto = ristocetin, LPA = lysophosphatidic acid, CRP = C-reactive protein.

| <b>Adhesion</b>           |                                            |                       |                                             |                                               |
|---------------------------|--------------------------------------------|-----------------------|---------------------------------------------|-----------------------------------------------|
| <b>Albumin</b>            | <b>Albumin + 5 mmol/L MgCl<sub>2</sub></b> | <b>Collagen</b>       | <b>Collagen + 5 mmol/L MgCl<sub>2</sub></b> | <b>Fibrinogen + 5 mmol/L MgCl<sub>2</sub></b> |
| Solvent                   | Solvent                                    | Solvent               | Solvent                                     | Solvent                                       |
| ADP 0.1; 1; 10            | ADP 1; 10                                  | ADP 0.1; 1; 10        | ADP 1; 10                                   | ADP 1; 10                                     |
| Risto 1                   | Risto 1                                    | Risto 1               | Risto 1                                     | Risto 1                                       |
| Adr 0.1; 1                | Adr 0.1; 1                                 | Adr 0.1; 1            | Adr 0.1; 1                                  | Adr 0.1; 1                                    |
| LPA 1; 10                 | LPA 1; 10                                  | LPA 1; 10             | LPA 1; 10                                   | LPA 1; 10                                     |
| LPA 1+Adr 0.1             |                                            | LPA 1+Adr 0.1         |                                             |                                               |
| LPA 10+Adr 0.1            |                                            | LPA 10+Adr 0.1        |                                             |                                               |
| LPA 1+Risto 1             |                                            | LPA 1+Risto 1         |                                             |                                               |
| LPA 10+Risto 1            |                                            | LPA 10+Risto 1        |                                             |                                               |
| Adr 0.1+Risto 1           |                                            | Adr 0.1+Risto 1       |                                             |                                               |
| ADP 0.1+Risto 1           |                                            | ADP 0.1+Risto 1       |                                             |                                               |
| <b>Flow Cytometry</b>     |                                            | <b>Other Measures</b> |                                             |                                               |
| <b>Fibrinogen-binding</b> | <b>P-selectin expression</b>               | TXB <sub>2</sub>      | LDL-cholesterol                             | Cholesterol                                   |
| ADP 0.1; 0.6              | ADP 0.6                                    | CRP                   | Apo-B                                       | Triglycerides                                 |
| SFLLRN 5.3                | SFLLRN 5.3                                 | Leukocyte count       | HDL-cholesterol                             |                                               |
|                           |                                            | Platelet count        | Apo-A1                                      |                                               |
